# Supplementary material
Source: PubMed Central journal article supplement (PMC1482494)
Supplement: pnas_0600118103_1.pdf [file pnas_0600118103_1.pdf]

**Table 3. Optimized SPT implicit solvent nonpolar MF parameter values and goodness-of-fit metrics**

| Parameters                                            | SPT component |                  |                  |
|-------------------------------------------------------|---------------|------------------|------------------|
|                                                       | SASA-only     | SAV-only         | Full SPT         |
| $\sigma_s$ , Å                                        | 2.2*          | 1.15 [1.01-1.27] | 1.11 [1.00-1.26] |
| $\gamma$ , cal·mol <sup>-1</sup> ·Å <sup>-2</sup>     | 17.1 (7)*     | --               | 3 (1)            |
| $p$ , cal·mol <sup>-1</sup> ·Å <sup>-3</sup>          | --            | 31.0 (9)         | 34 (1)           |
| $R$                                                   | 0.39*         | 0.77             | 0.78             |
| $R$                                                   | 0.63*         | 0.88             | 0.88             |
| $\chi^2$ , 10 <sup>-3</sup>                           | 19.6*         | 7.32             | 7.20             |
| kcal <sup>2</sup> ·mol <sup>-2</sup> ·Å <sup>-2</sup> |               |                  |                  |

Fits to the total explicit solvation force were performed for SASA-only, SAV-only, and full SPT forms of the implicit repulsive solvation MFs. Where applicable, standard errors are presented in parentheses; 99% confidence intervals are presented in brackets.

\*  $\sigma_s$  parameters that reached the end (2.2 Å) of the search interval.
