# Supplementary material
Source: PubMed Central journal article supplement (PMC1482494)

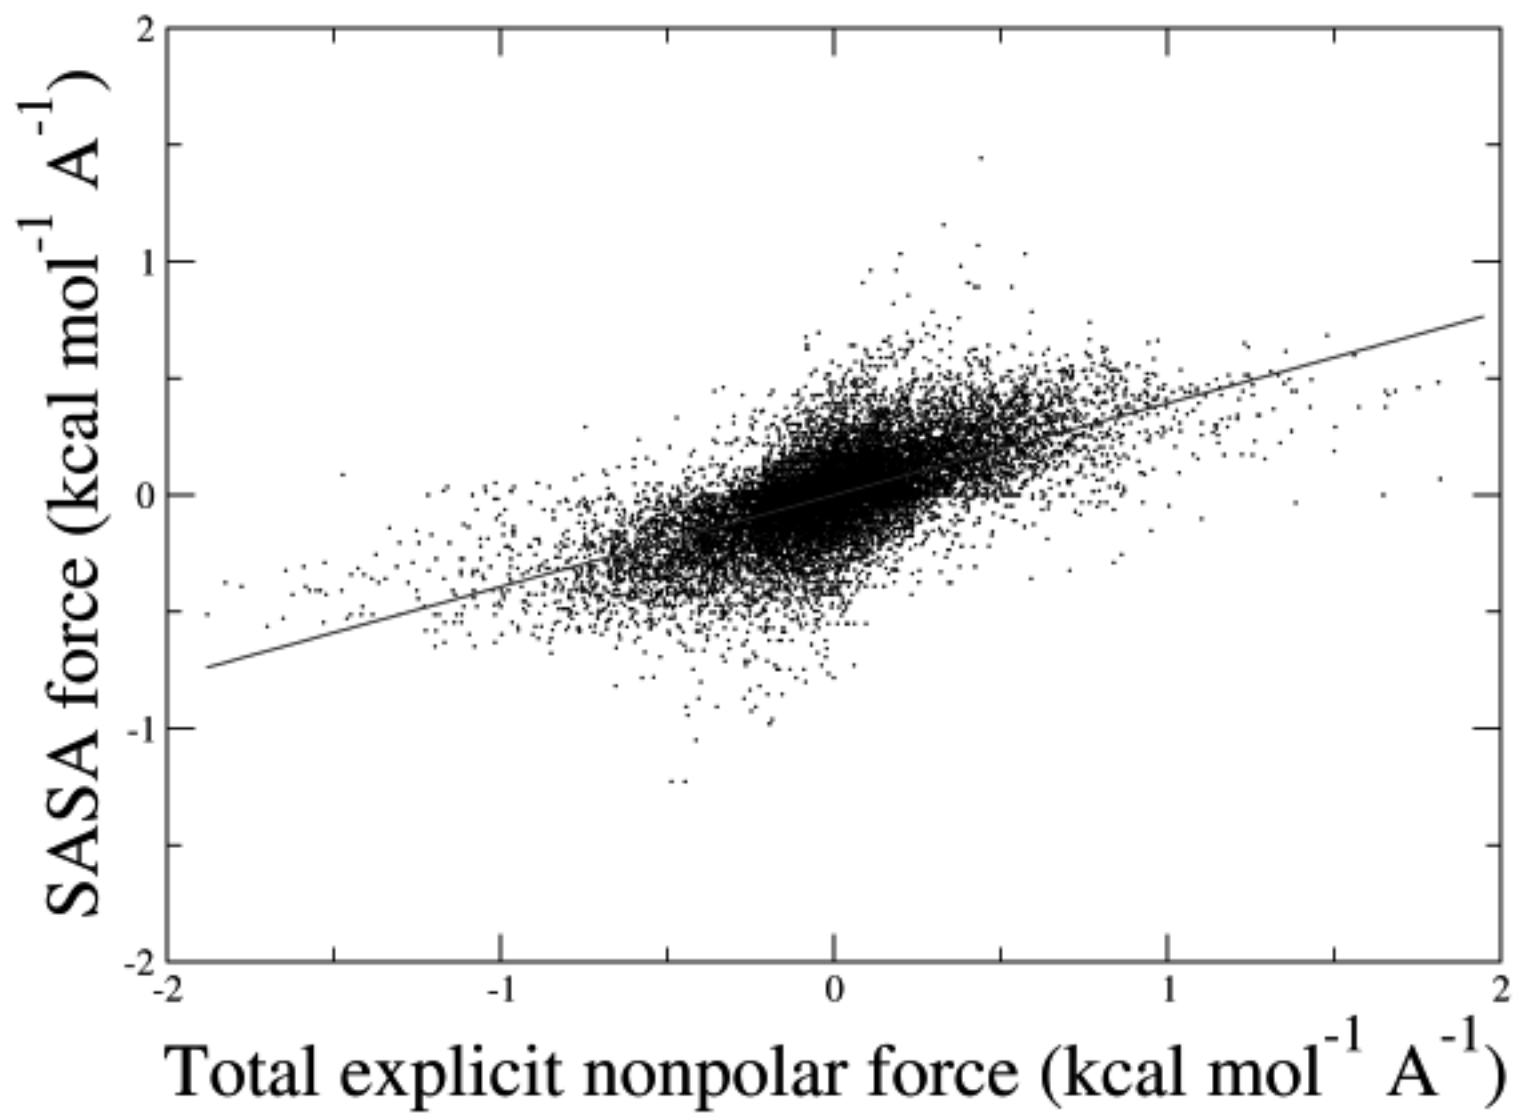

Supplement: pnas_0600118103_3.pdf [file pnas_0600118103_3.pdf]

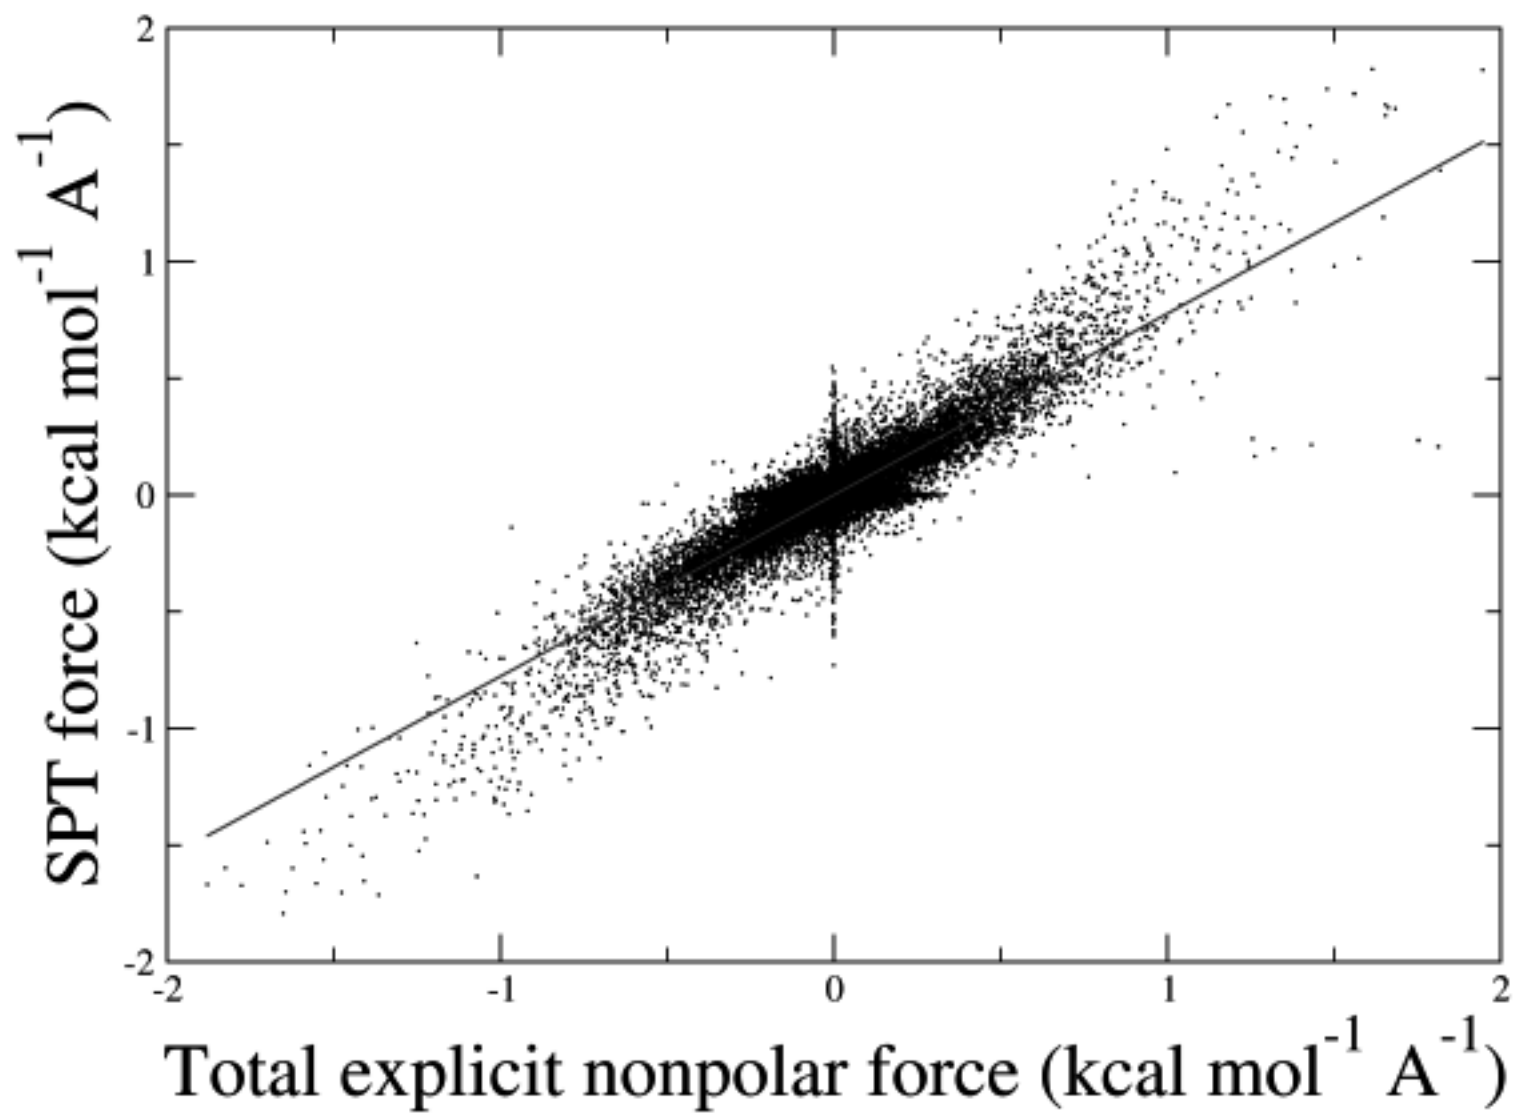

Supplement: pnas_0600118103_5.pdf [file pnas_0600118103_5.pdf]

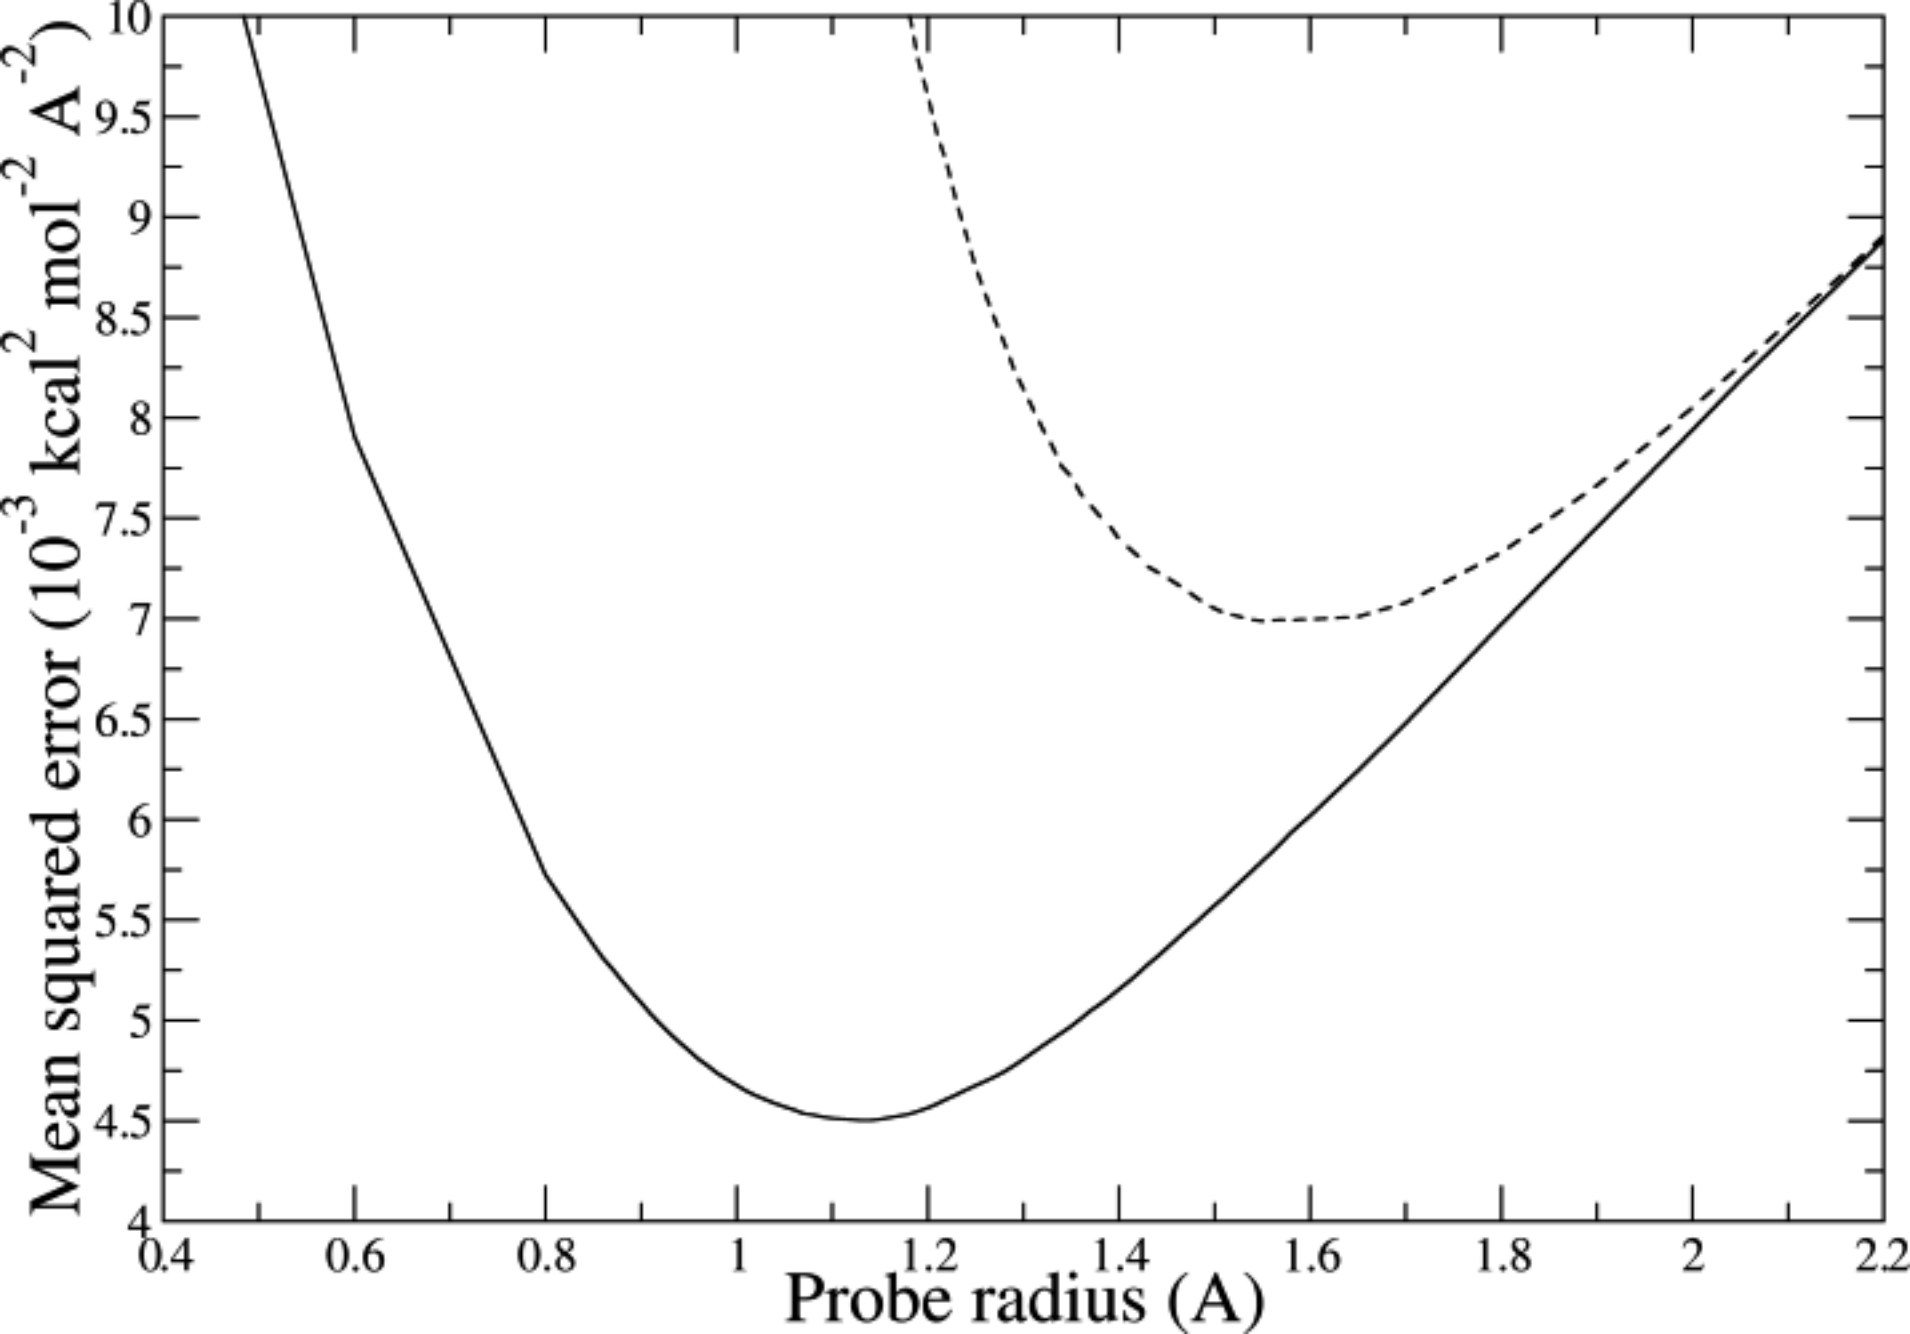

Supplement: pnas_0600118103_6.pdf [file pnas_0600118103_6.pdf]

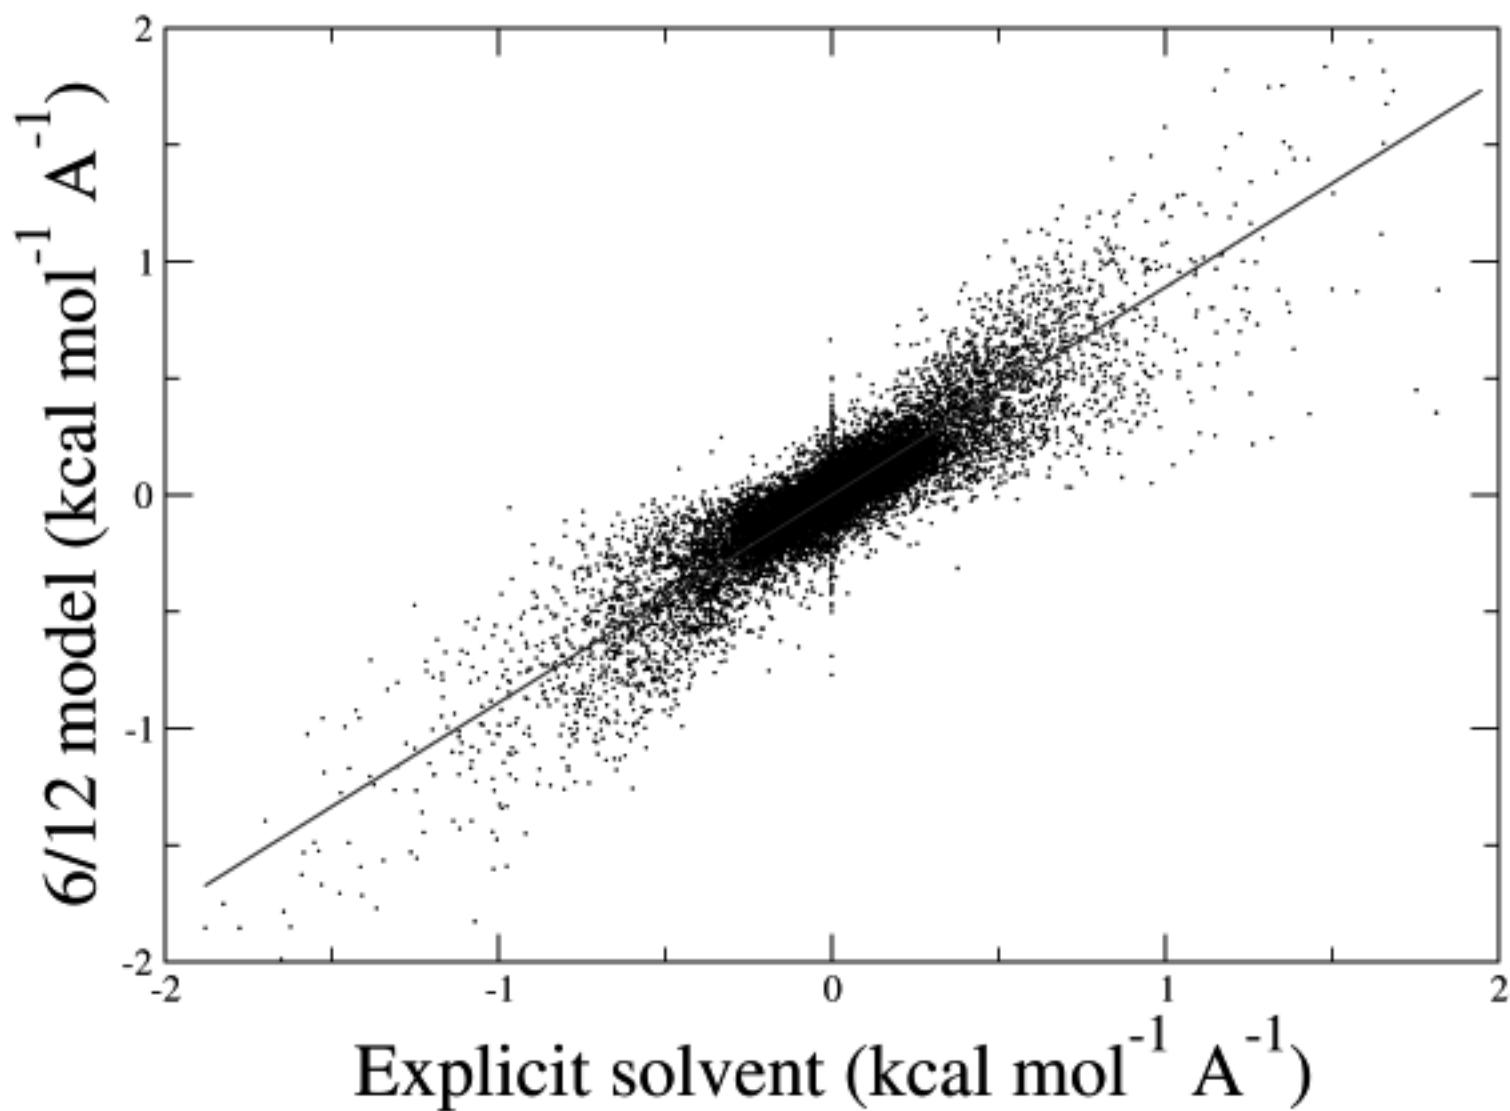

Supplement: pnas_0600118103_8.pdf [file pnas_0600118103_8.pdf]
